# Supplementary material for: Non-precious metal carbamates as catalysts for the aziridine/CO2 coupling reaction under mild conditions
Source: Royal Society of Chemistry journal article supplement (doi:10.1039/d1dt00525a), 2021-01-01

# Non-Precious Metal Carbamates as Catalysts for the Aziridine/CO<sub>2</sub> Coupling Reaction Under Mild Conditions

Giulio Bresciani, Stefano Zacchini, Fabio Marchetti, Guido Pampaloni

## Supporting Information

| <b><u>Table of contents</u></b>  | <i>Page</i> |
|----------------------------------|-------------|
| IR spectra of niobium complexes  | S2          |
| NMR spectra of niobium complexes | S3-S5       |
| NMR spectra of aziridines        | S6-S9       |
| NMR spectra of oxazolidinones    | S10-S13     |

**Figure S1.** IR (solid state) spectrum of  $\text{NbCl}_3(\text{O}_2\text{CNEt}_2)_2$ ,  $\text{Nb}^{\text{Cl}}$ .

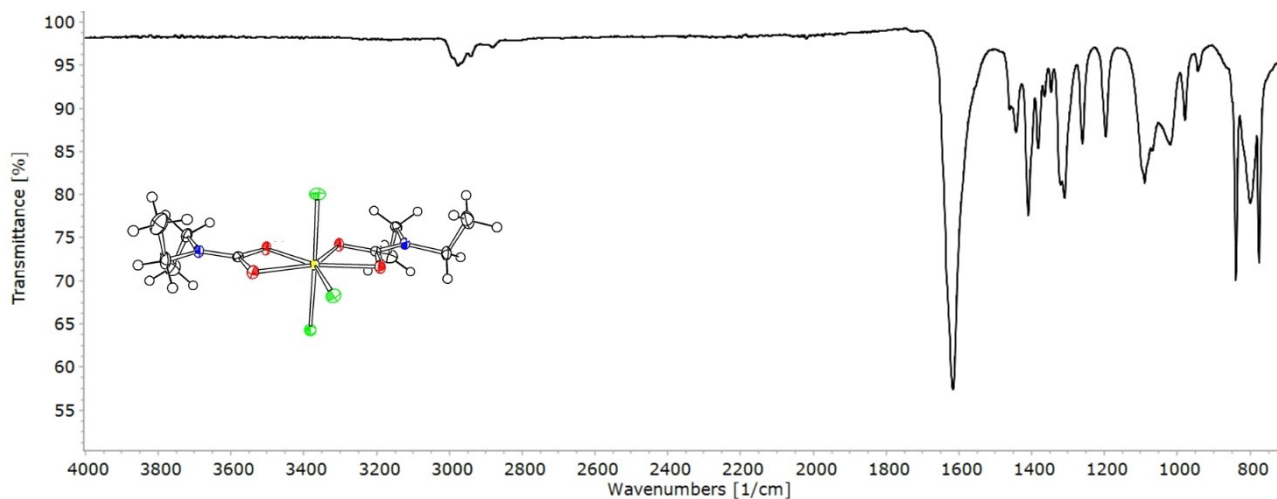

**Figure S2.** IR (solid state) spectrum of  $\text{NbBr}_3(\text{O}_2\text{CNEt}_2)_2$ ,  $\text{Nb}^{\text{Br}}$ .

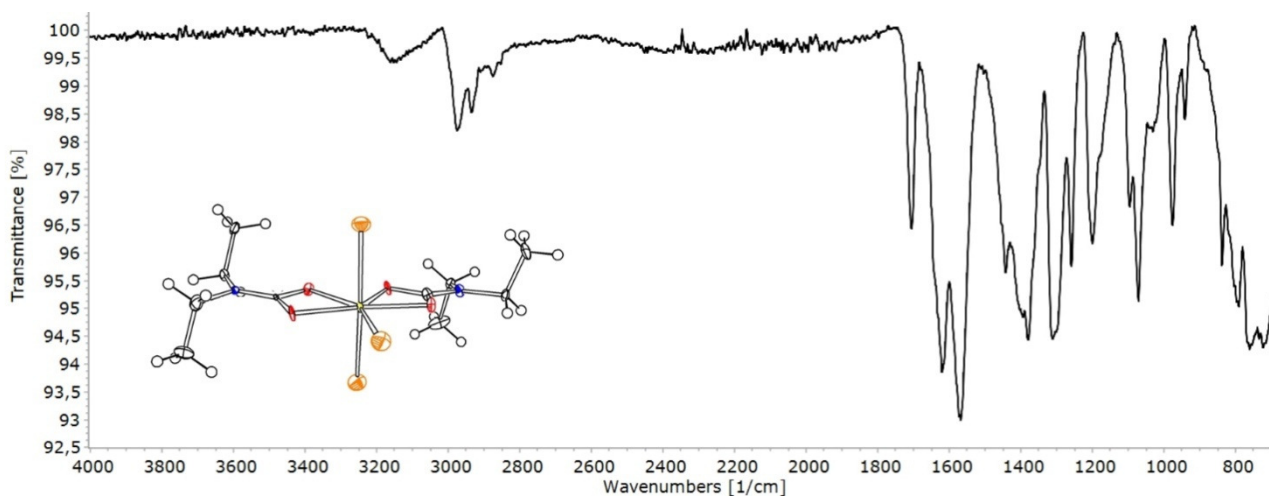

**Figure S3.**  $^1\text{H}$  NMR ( $\text{CDCl}_3$ , 298K) spectrum of  $\text{NbCl}_3(\text{O}_2\text{CNET}_2)_2$ ,  $\text{Nb}^{\text{Cl}}$ .

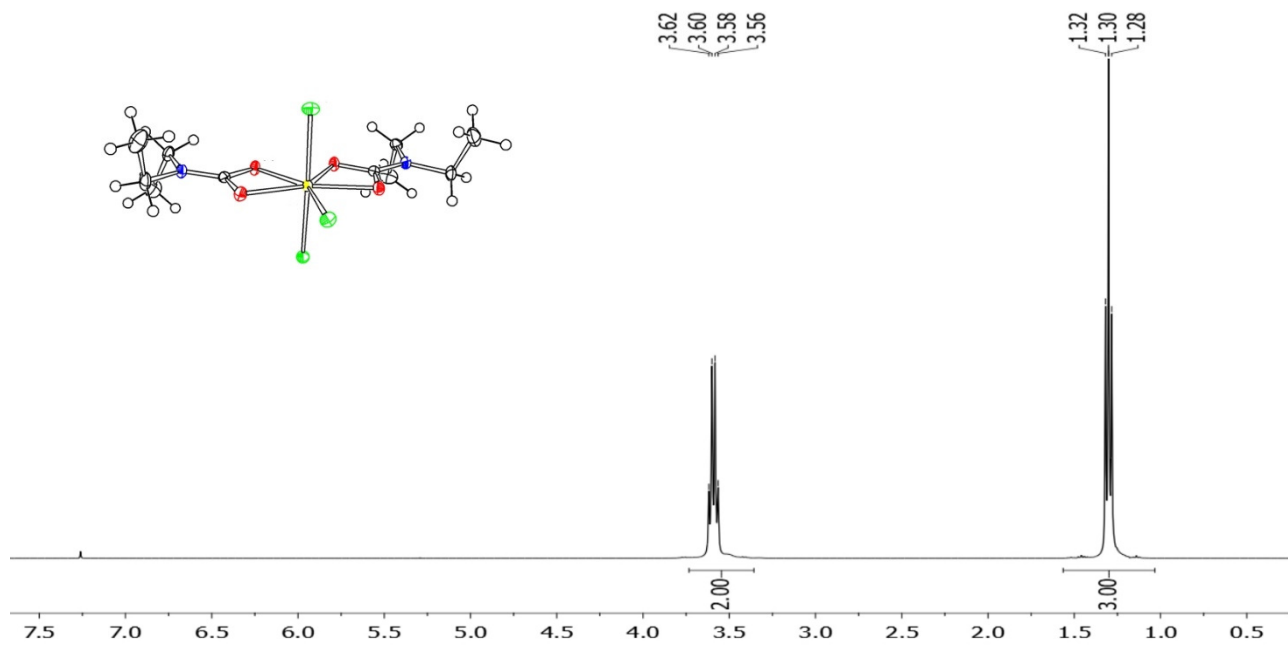

**Figure S4.**  $^{13}\text{C}$  NMR ( $\text{CDCl}_3$ , 298K) spectrum of  $\text{Nb}^{\text{Cl}}$ .

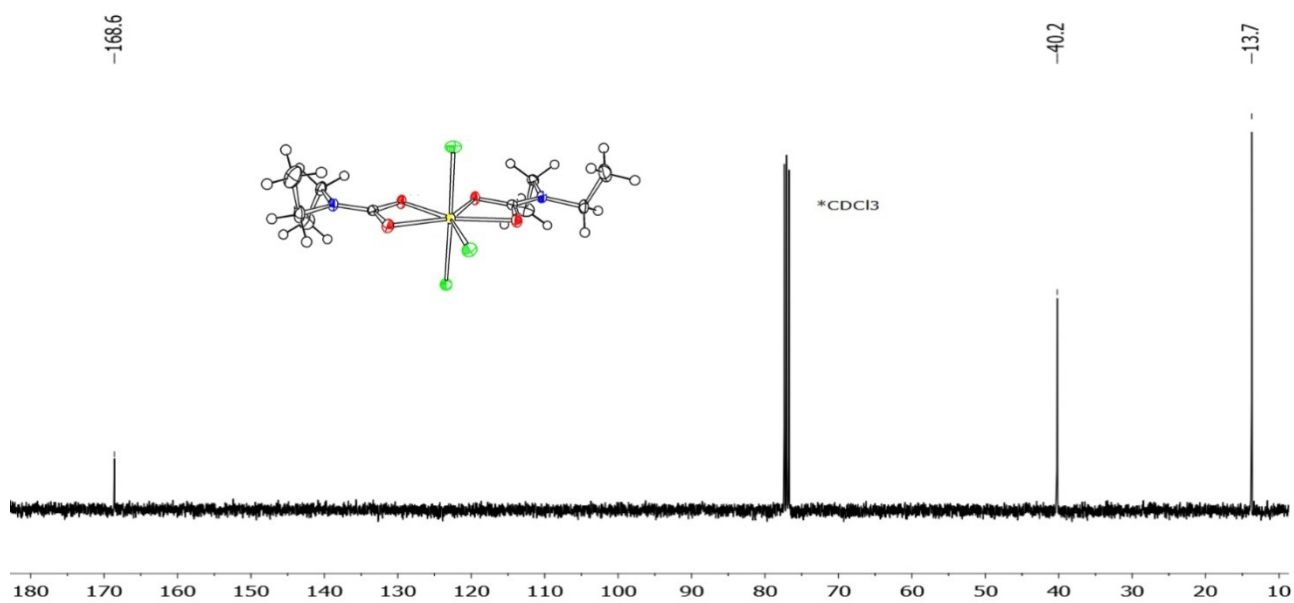

**Figure S5.**  $^{93}\text{Nb}$  NMR ( $\text{CDCl}_3$ , 298K) spectrum of  $\text{Nb}^{\text{Cl}}$ .

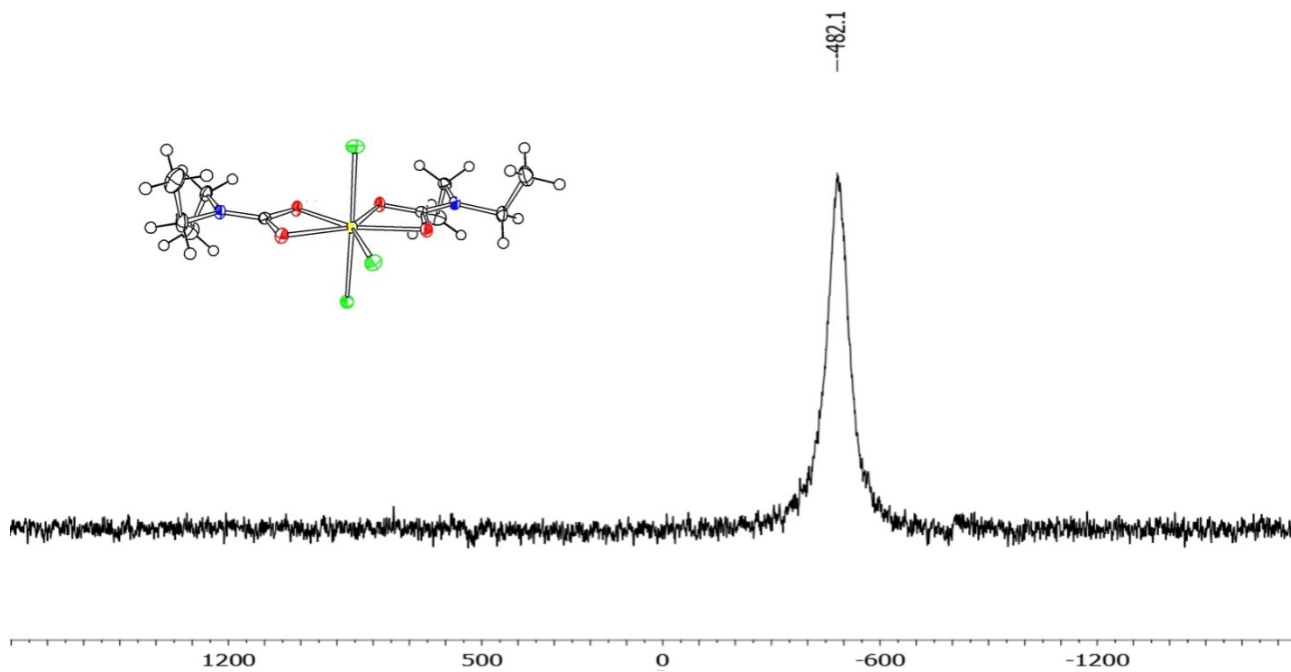

**Figure S6.**  $^1\text{H}$  NMR ( $\text{CDCl}_3$ , 298K) spectrum of  $\text{NbBr}_3(\text{O}_2\text{CNEt}_2)_2$ ,  $\text{Nb}^{\text{Br}}$ .

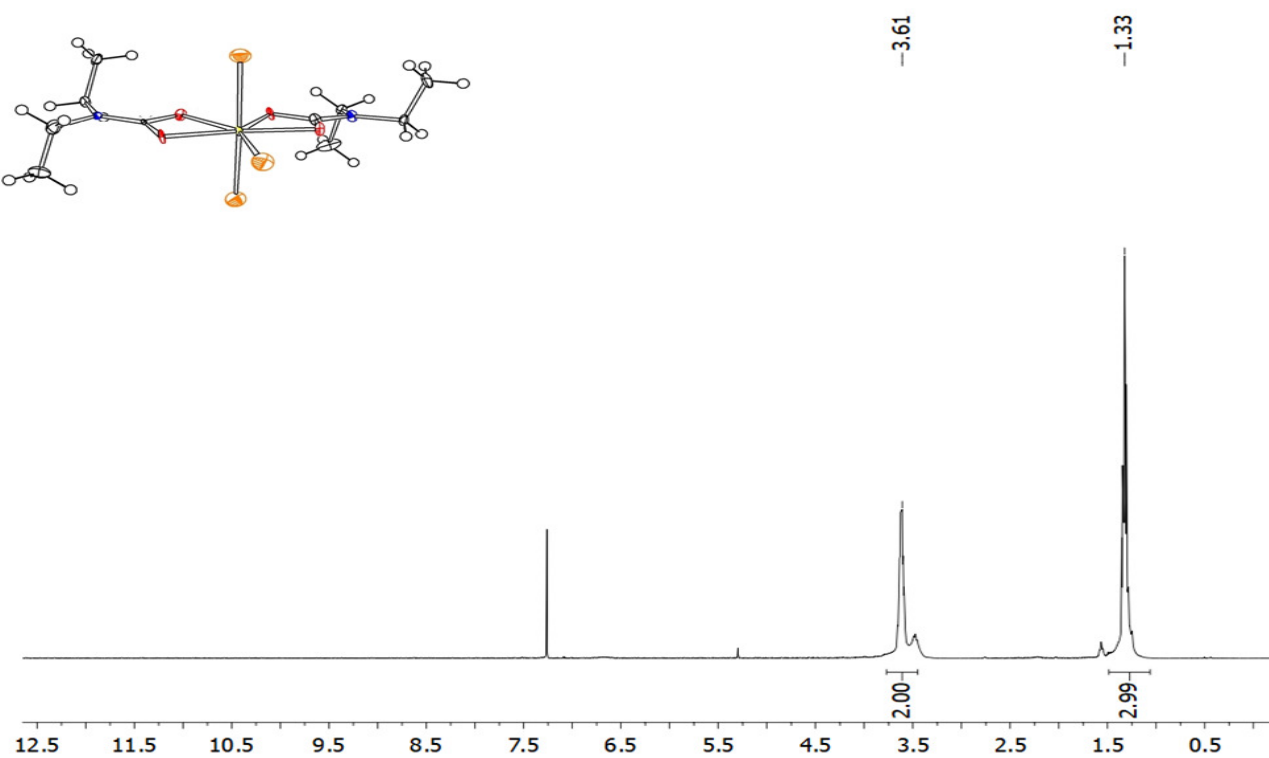

**Figure S7.**  $^{13}\text{C}$  NMR ( $\text{CDCl}_3$ , 298K) spectrum of  $\text{Nb}^{\text{Br}}$ .

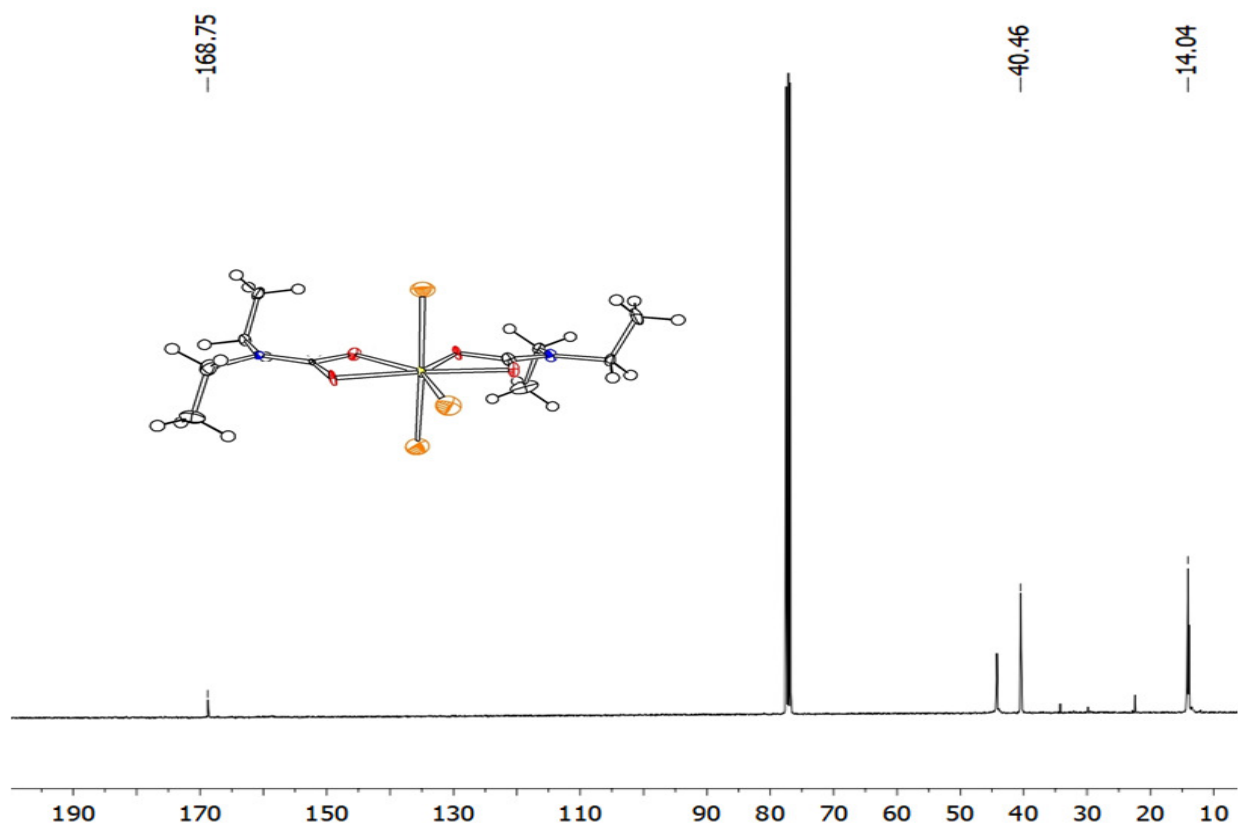

# NMR Spectra of aziridines

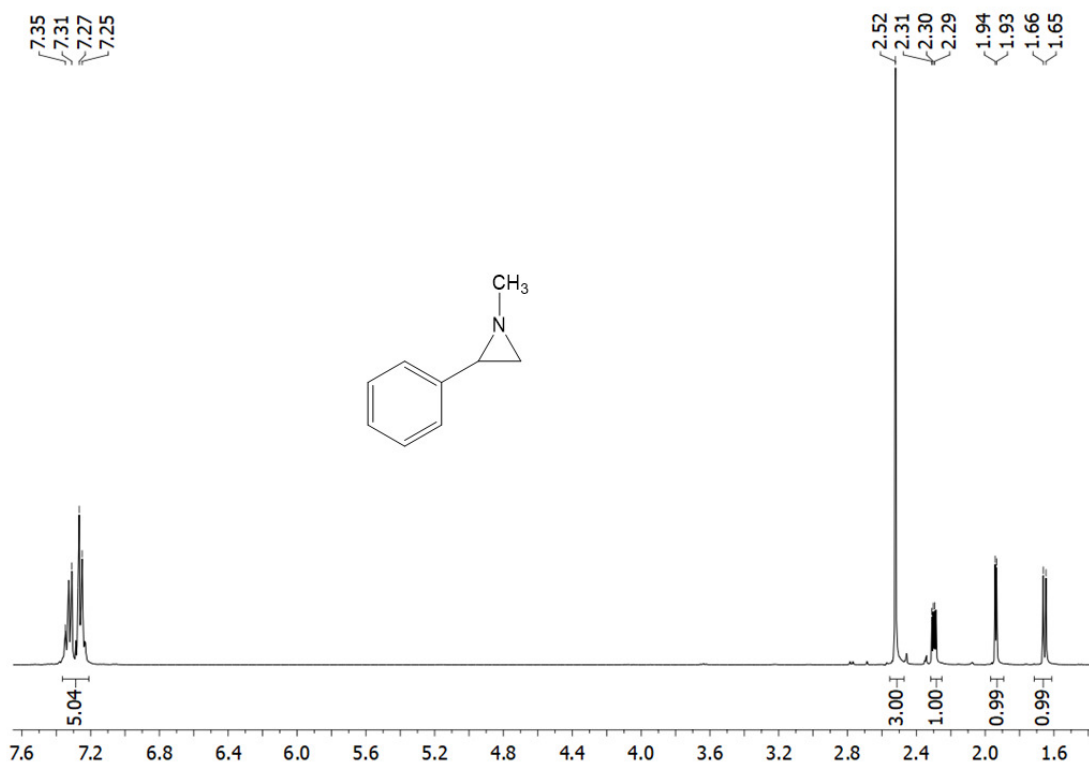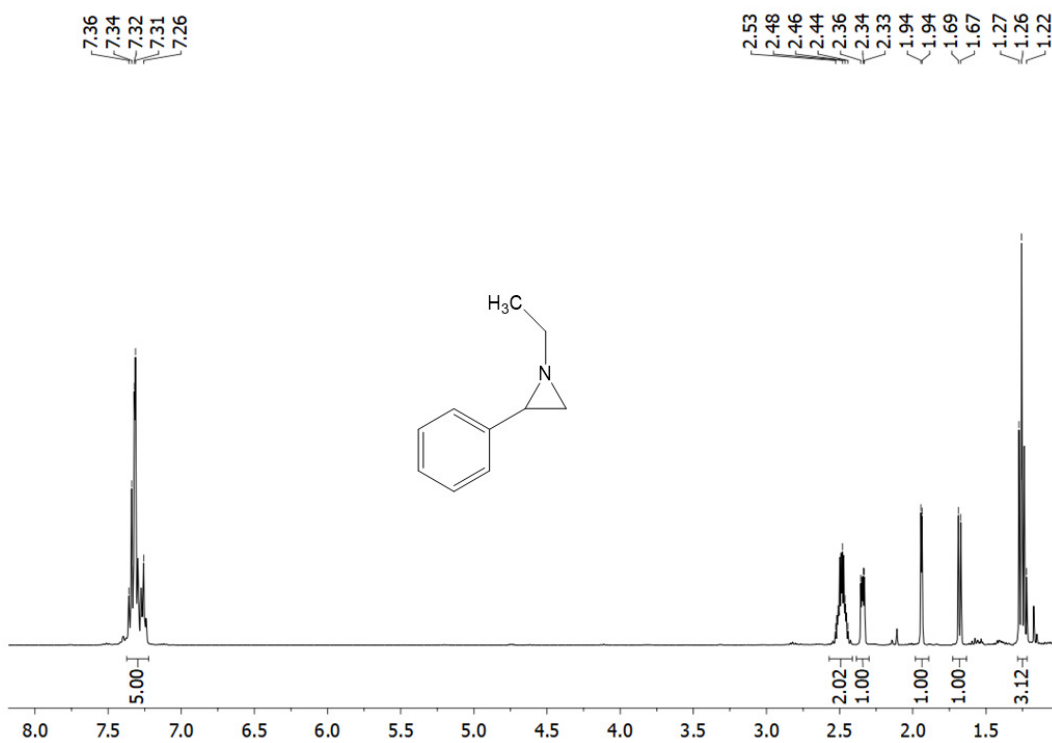

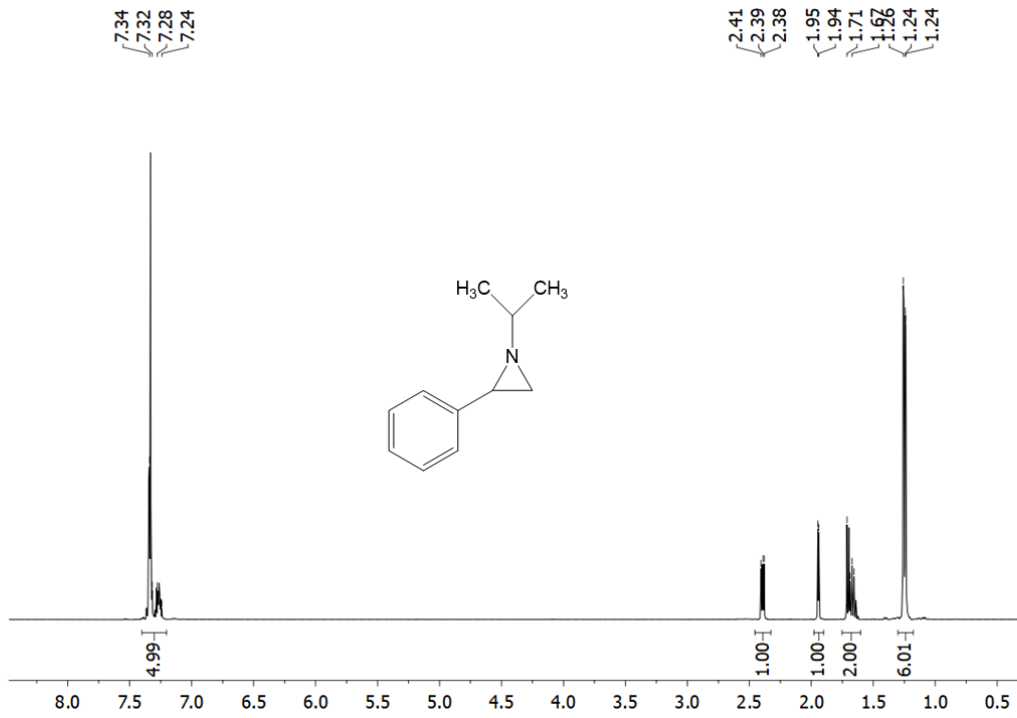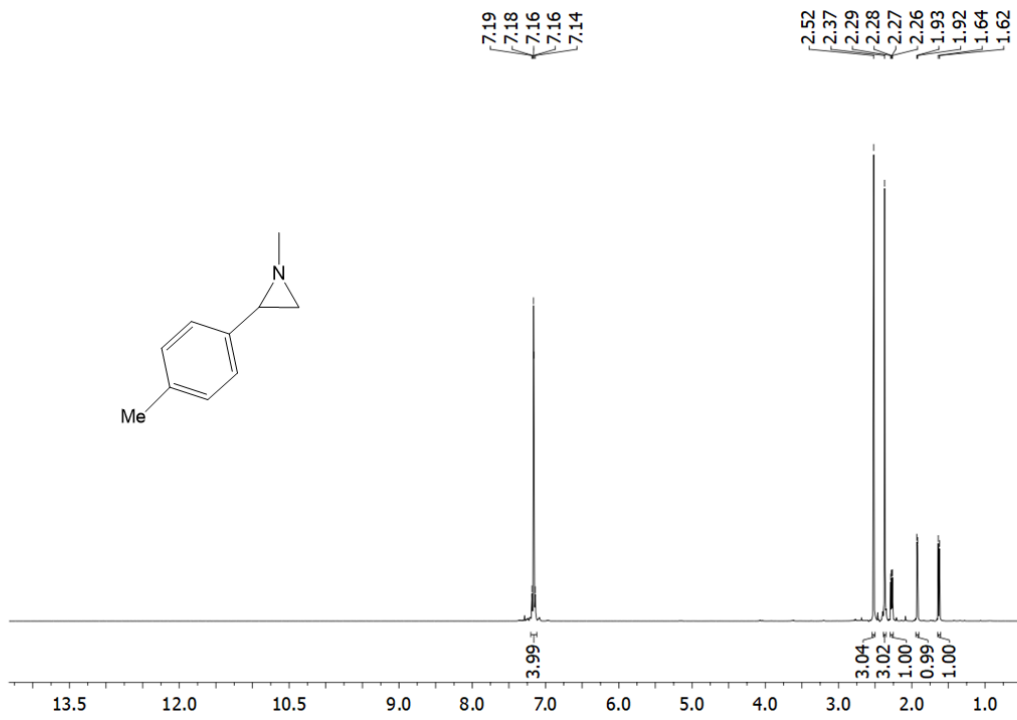

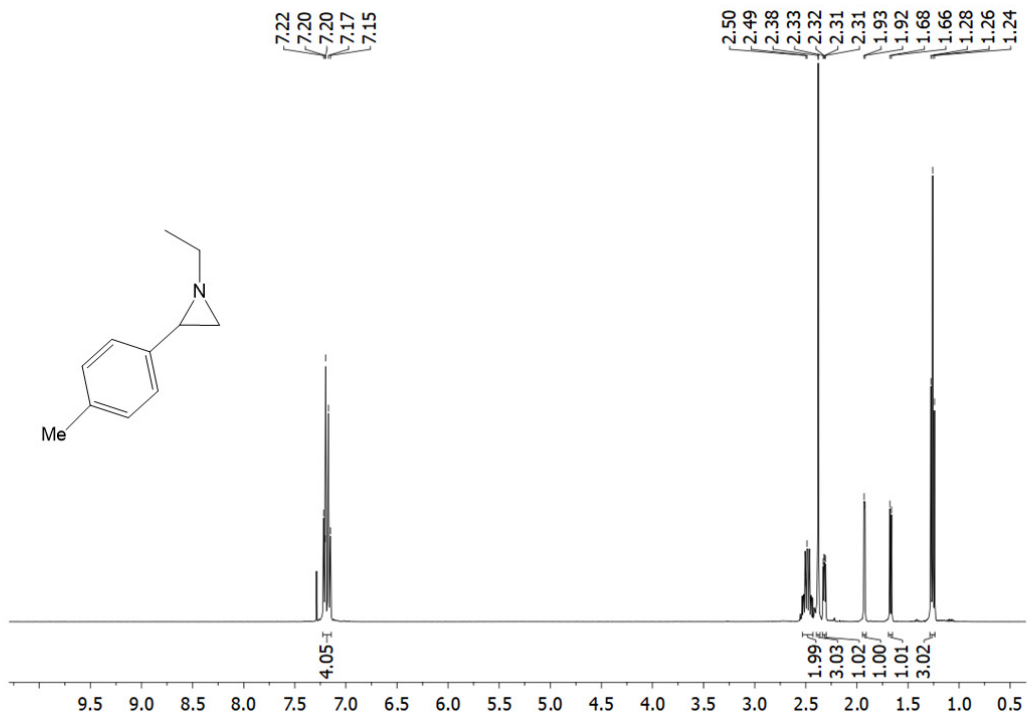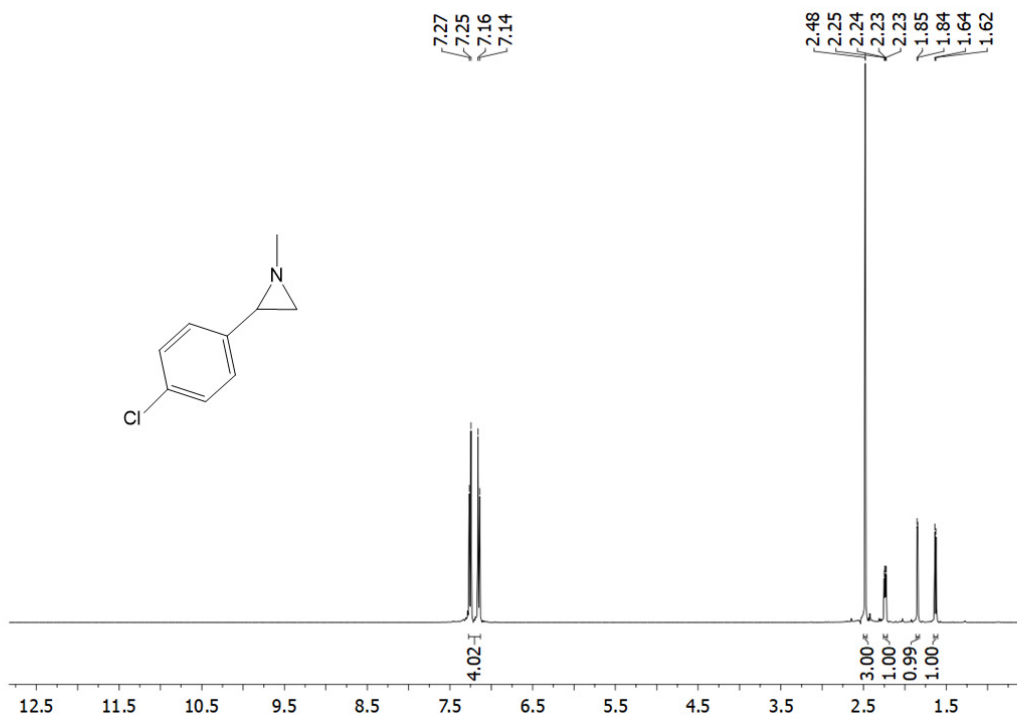



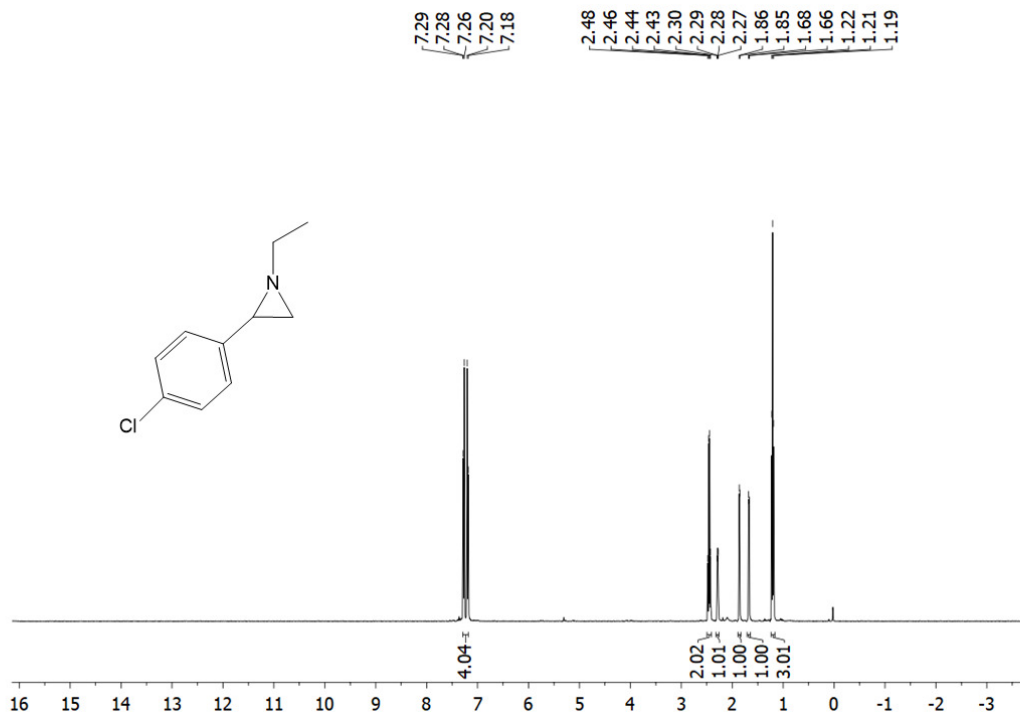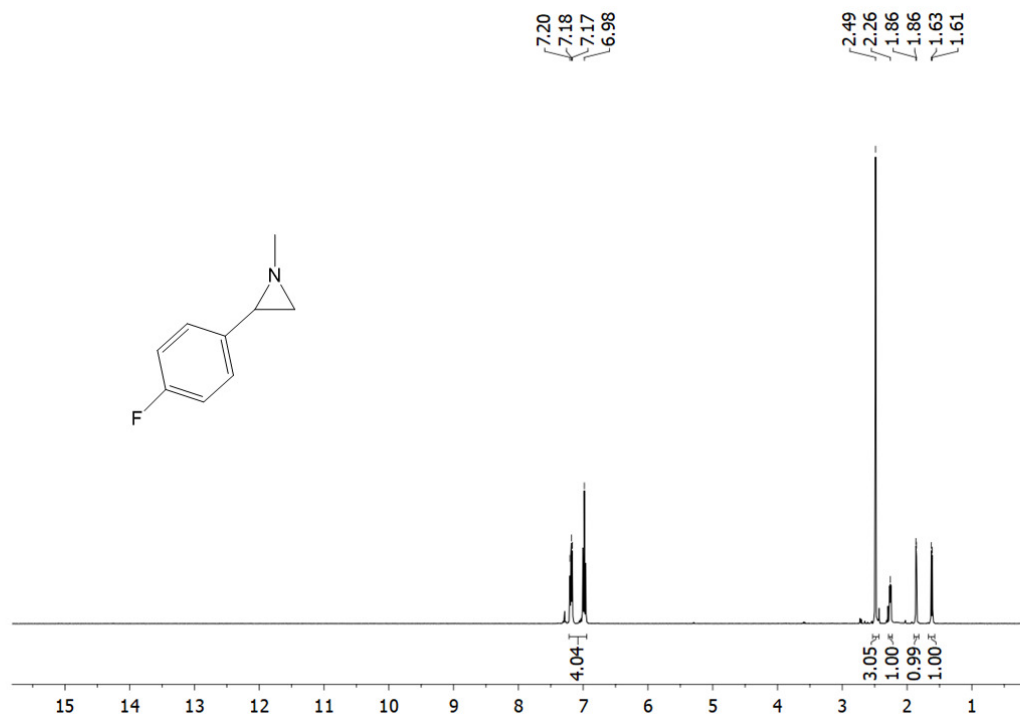

# NMR Spectra of oxazolidinones

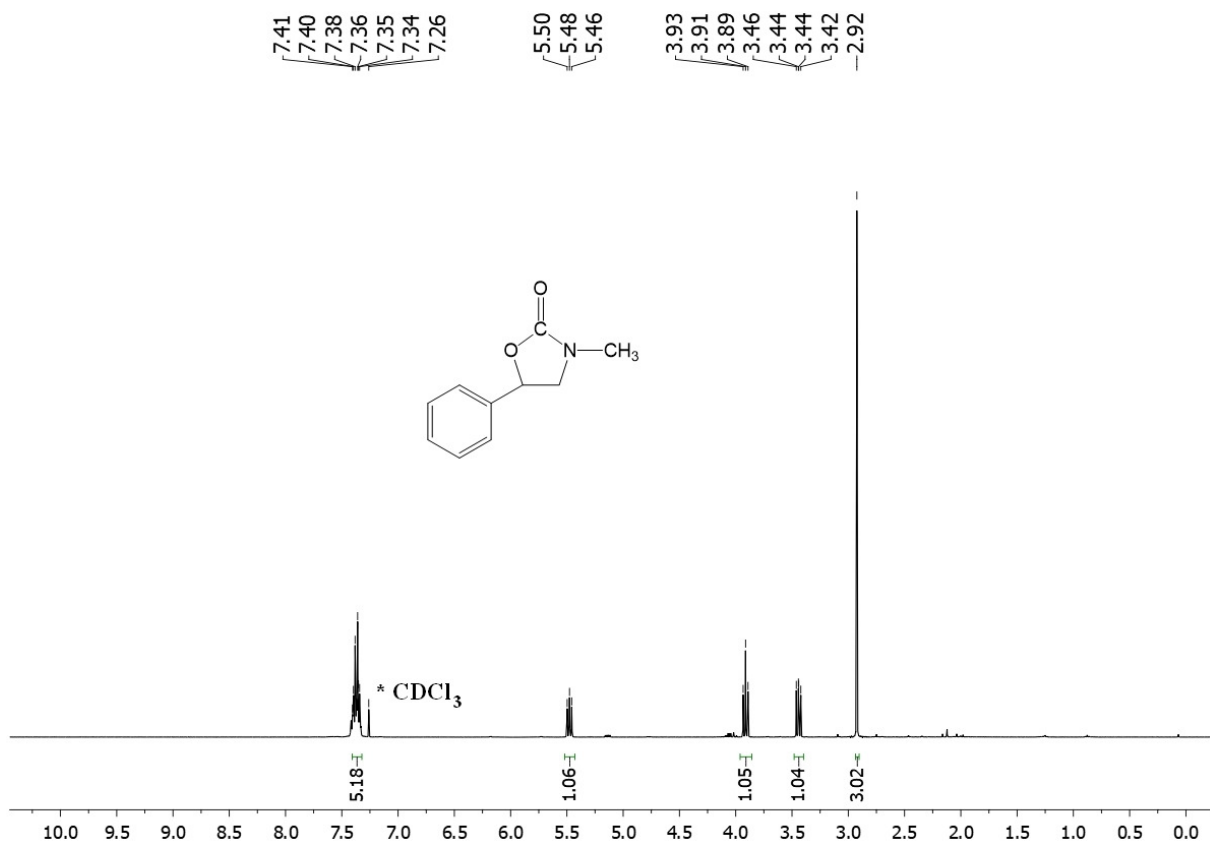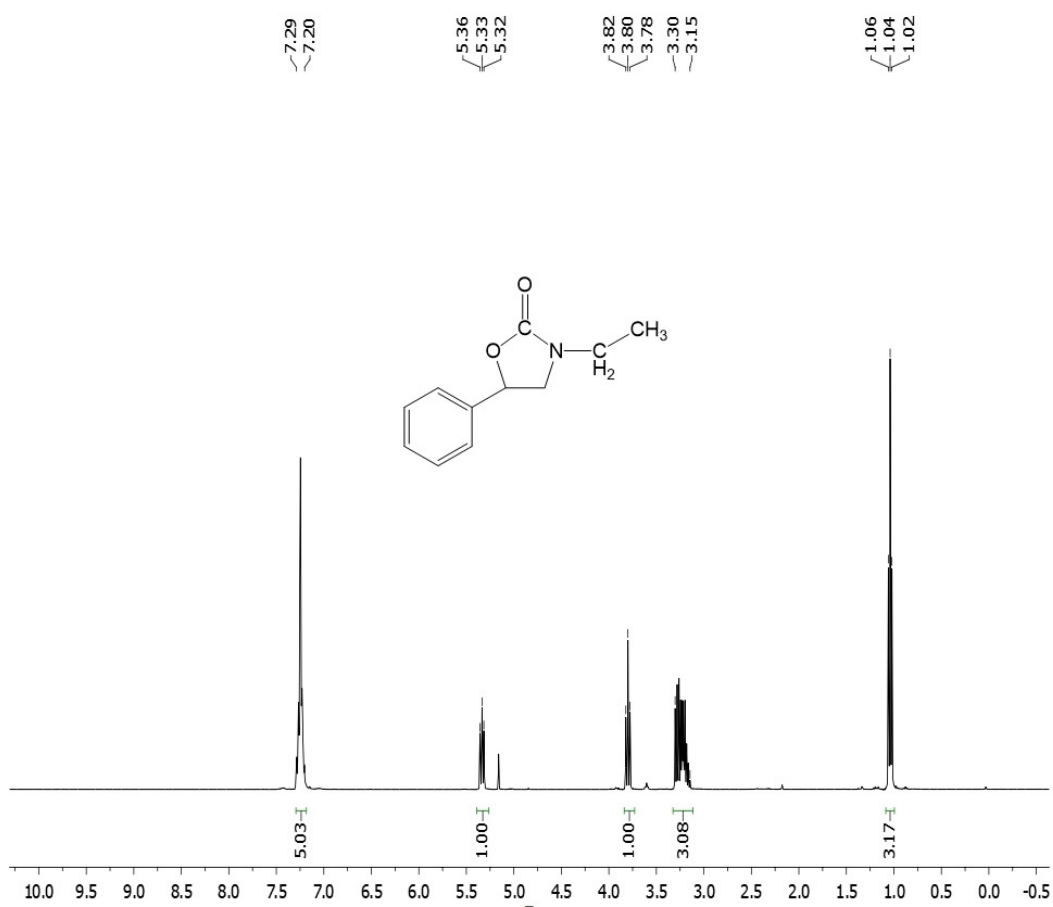

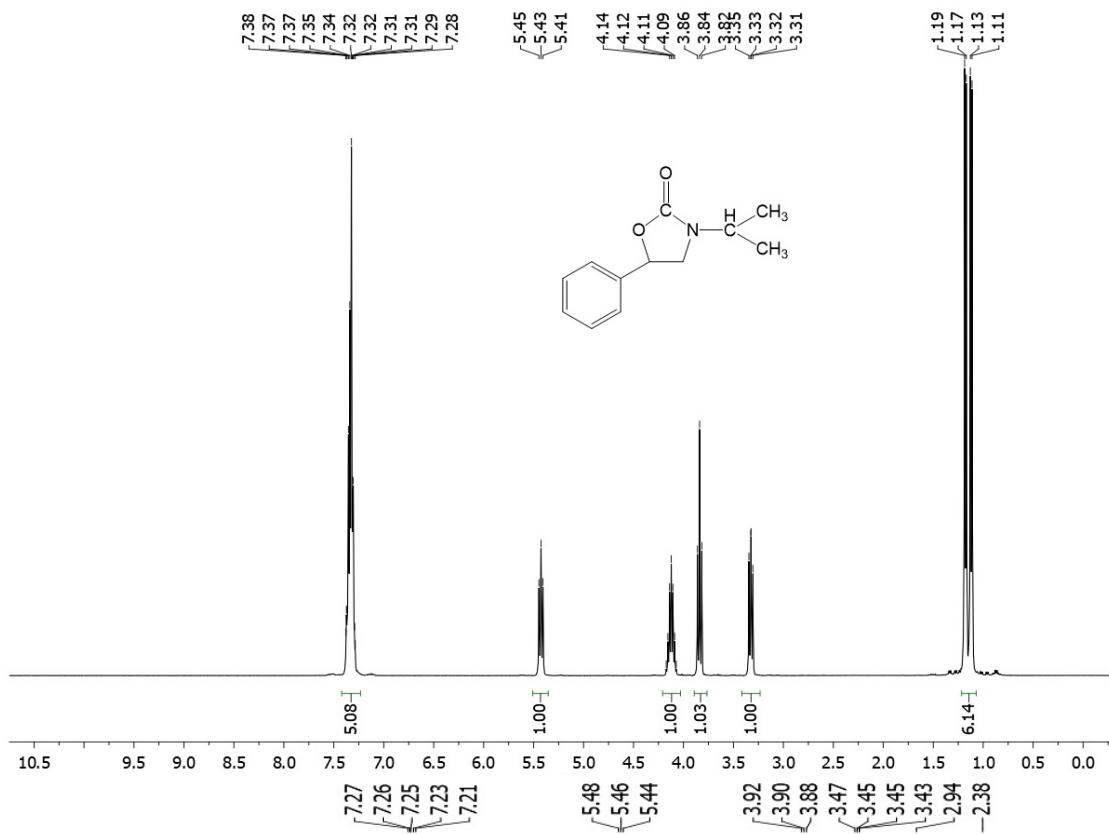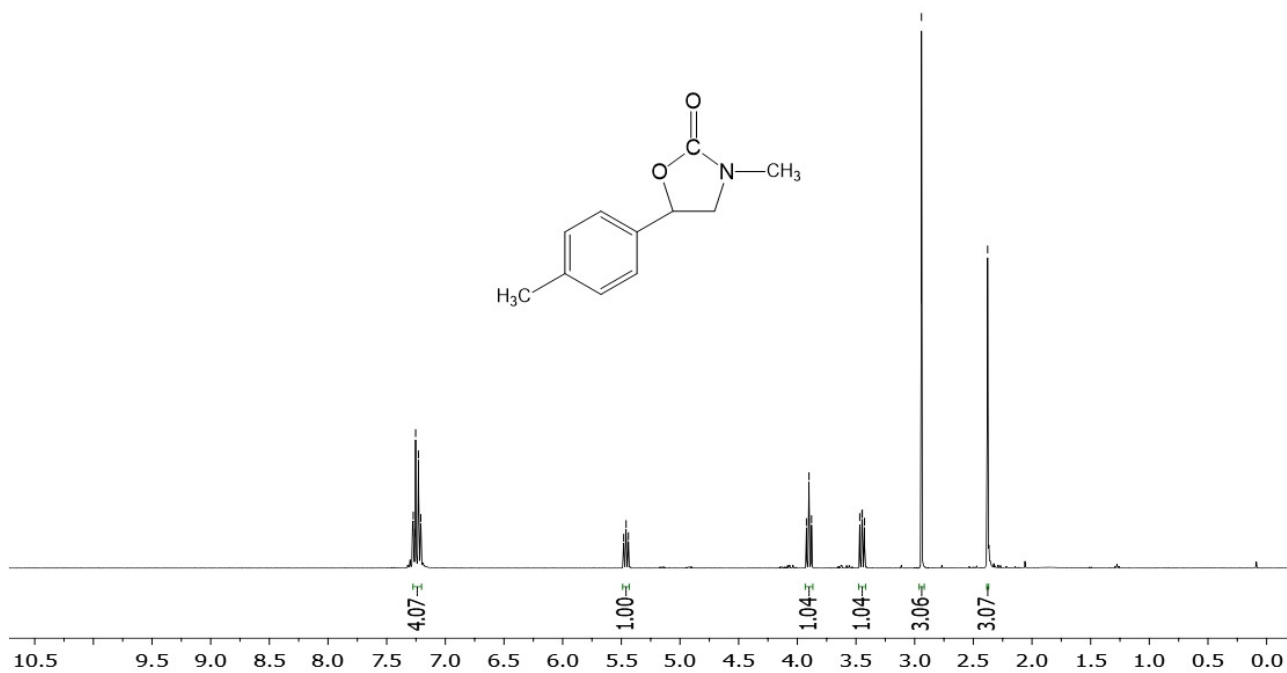

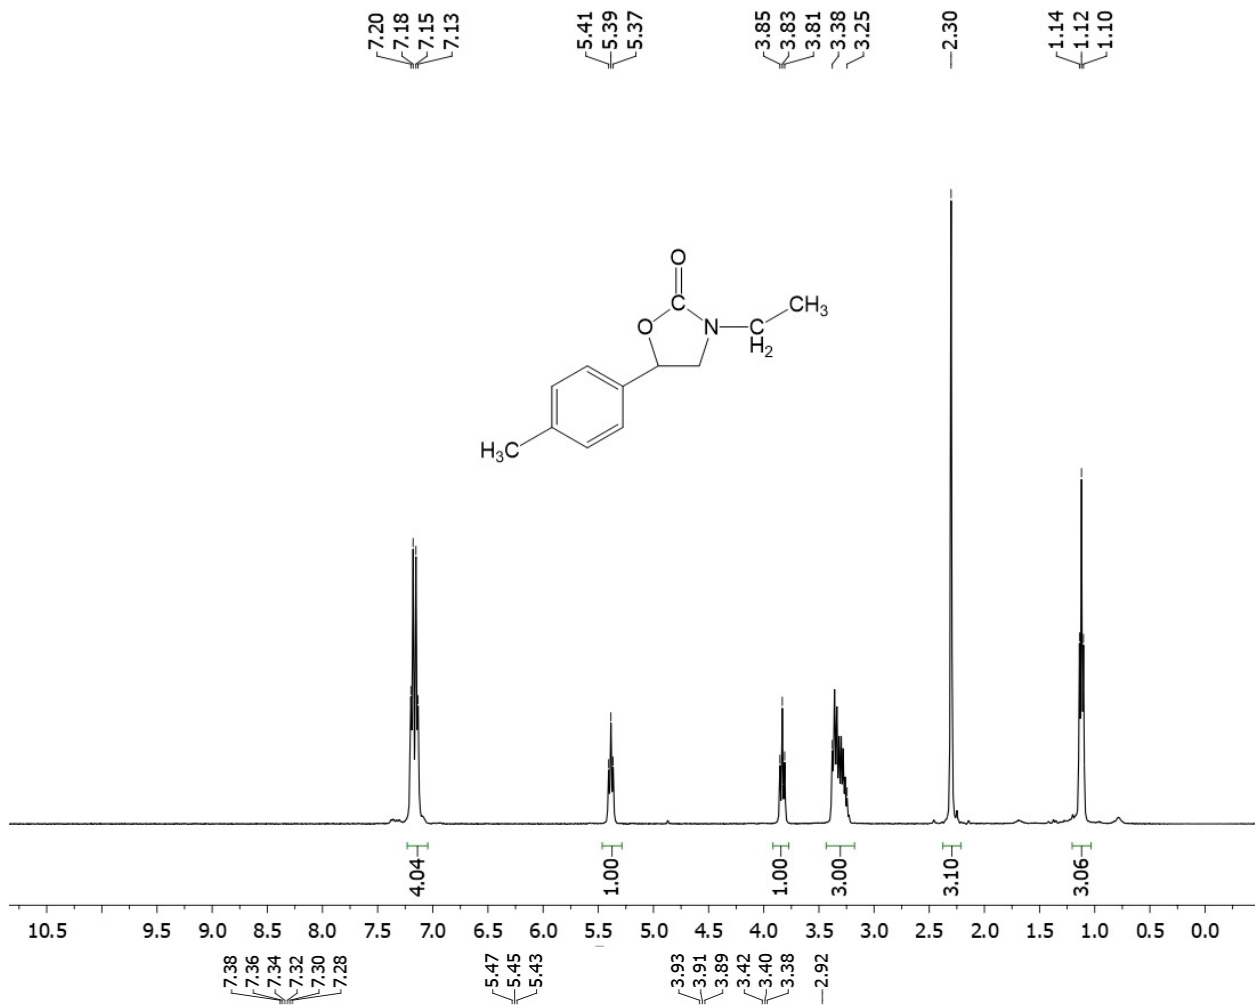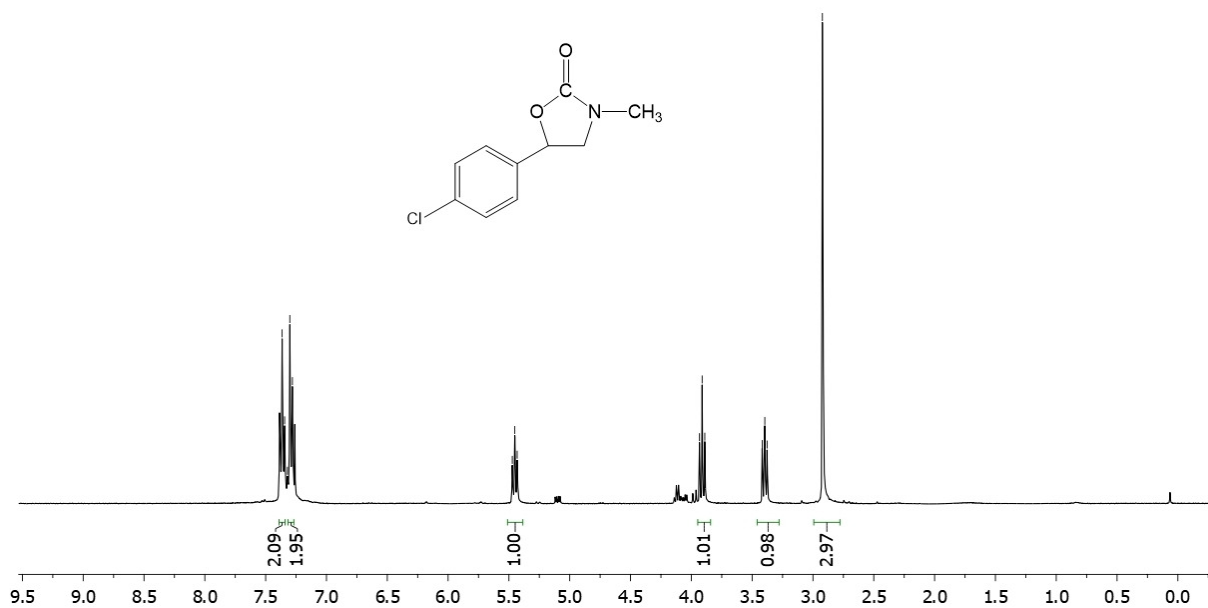

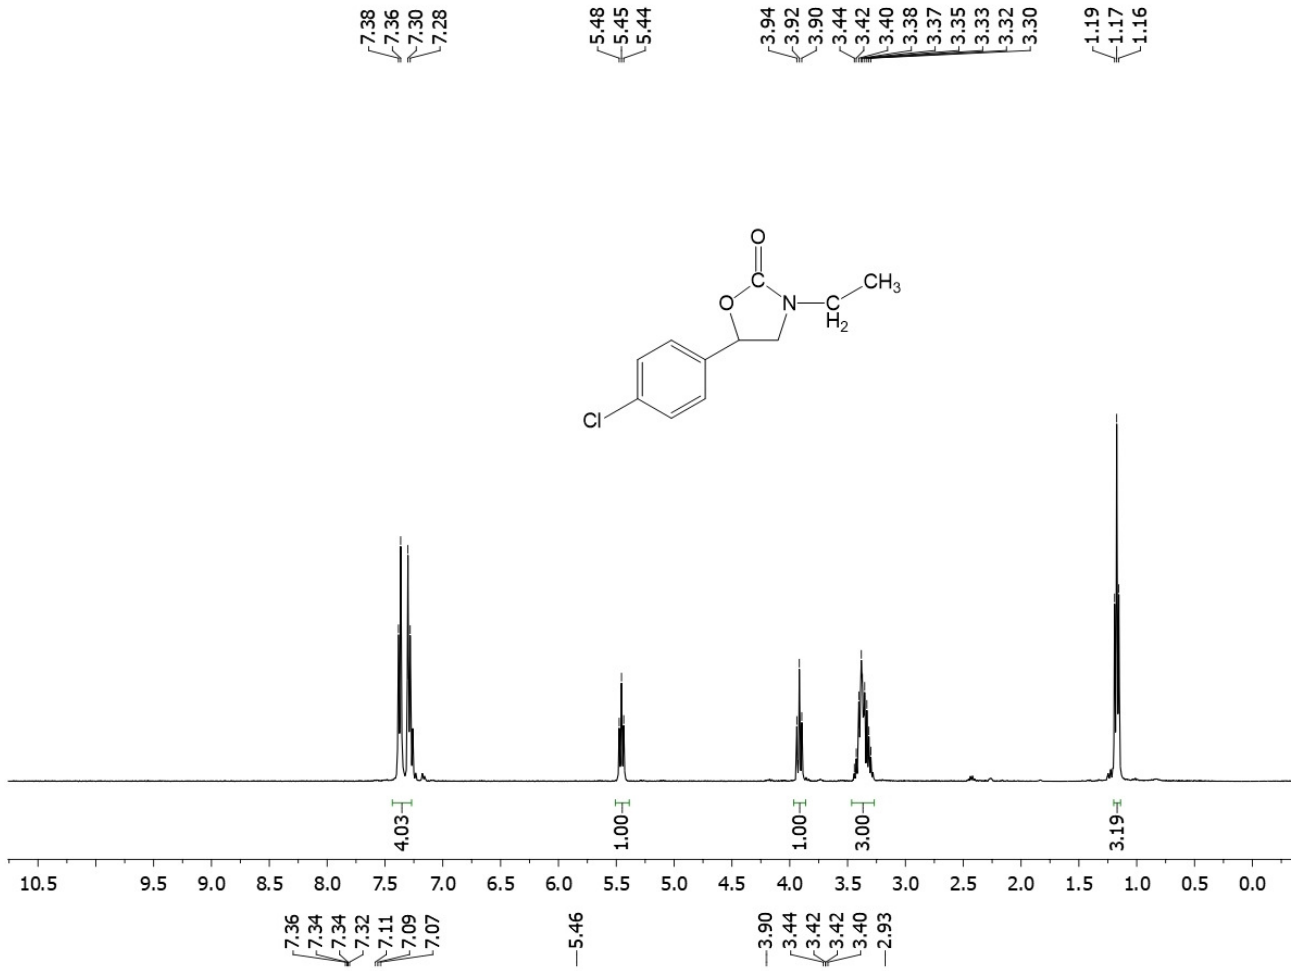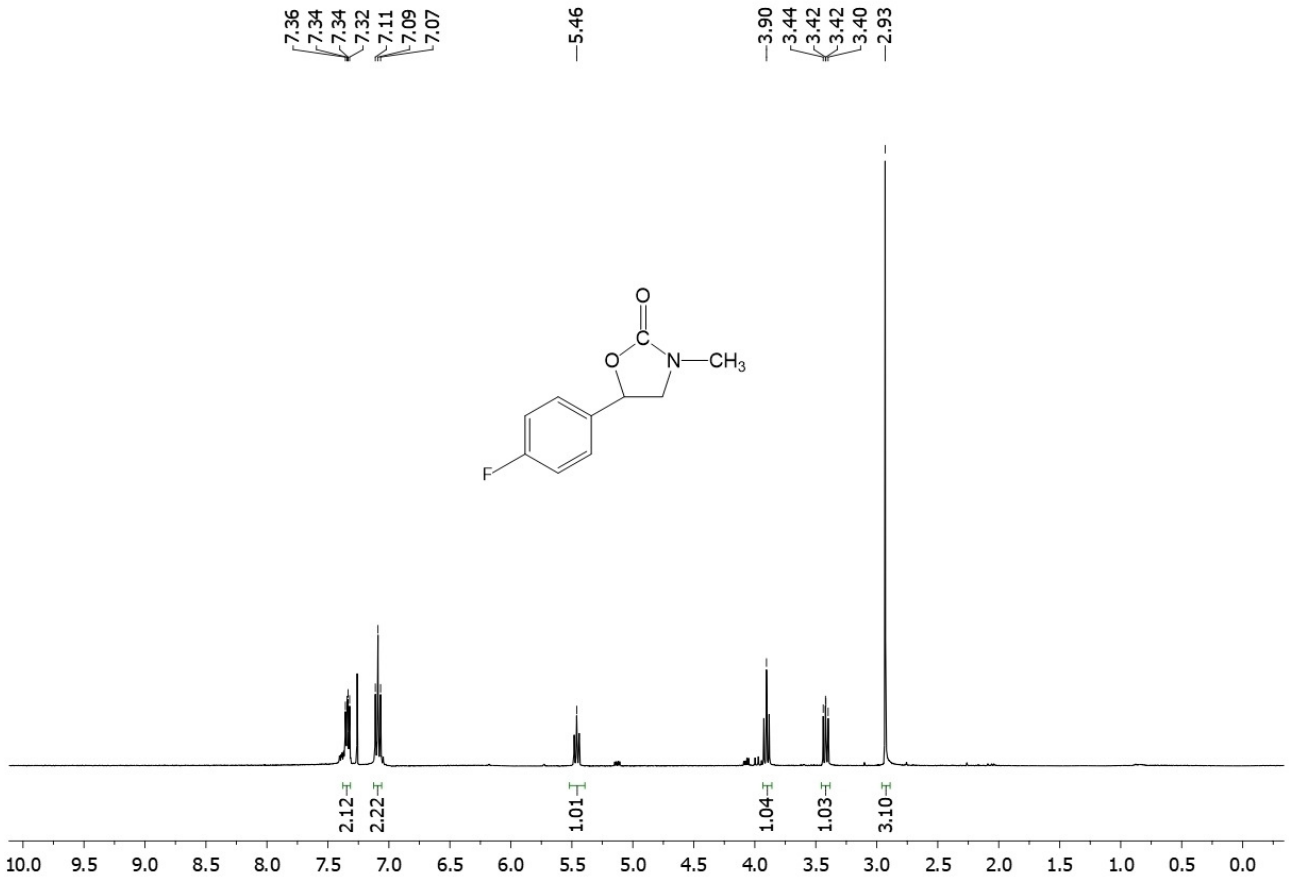

Supplement: d1dt00525a1.pdf [file d1dt00525a1.pdf]
